# Supplementary material for: Investigation of CO2 capture mechanisms of liquid-like nanoparticle organic hybrid materials via structural characterization
Source: Royal Society of Chemistry journal article supplement (doi:10.1039/c1cp22631b), 2011-01-01
Supplement: c1cp22631b.pdf [file c1cp22631b.pdf]

*Electronic Supplementary Information*

Investigation of CO<sub>2</sub> Capture Mechanisms of Liquid-like  
Nanoparticle Organic Hybrid Materials via Structural  
Characterization

Youngjune Park,<sup>a</sup> John Decatur,<sup>b</sup> Kun-Yi Andrew Lin<sup>a</sup> and Ah-Hyung Alissa Park<sup>a,\*</sup>

<sup>a</sup>Department of Earth and Environmental Engineering, Chemical Engineering and Lenfest Center for Sustainable Energy, Columbia University, New York, New York 10027

<sup>b</sup>Department of Chemistry, Columbia University, New York, New York 10027

\*Corresponding author: Tel.: 1-212-854-8989; Fax: 1-212-854-7081; Email address: ap2622@columbia.edu

## Table of Contents

**Figure S1.** 2D  $^1\text{H}$ - $^{13}\text{C}$  edited HSQC NMR spectra of Jeffamine M-600 in  $\text{DMSO-}d_6$  at 298 K.

**Figure S2.** 2D COSY NMR spectra of (a) Jeffamine M-600 and (b) NOHM-I-PE600 in  $\text{DMSO-}d_6$  at 298 K.

**Figure S3.** ATR FT-IR spectrum of NOHM-I-PE600 in the range of bending modes of  $-\text{NH}_3^+$ .

**Figure S4.** (a) AFM and (b) TEM images of NOHM-I-PE2070 (22 nm  $\text{SiO}_2$  core).

**Figure S5.** ATR FT-IR Spectra of NOHM-I-PE2070 under elevated  $\text{CO}_2$  partial pressure at 298 K. (a) Intensity changes of  $\nu_3$  band of  $\text{CO}_2$  absorption at  $2335\text{ cm}^{-1}$  as a function of pressure (0 – 5.5 MPa). (b) Intensity changes of the absorption bands of C–O (sigma bond) as a function of  $\text{CO}_2$  pressure (0 – 5.5 MPa).

**Figure S6.** ATR FT-IR peak behavior of  $\nu_2$  band of  $\text{CO}_2$  as a function of pressure (0 – 5.5 MPa) at 298 K.

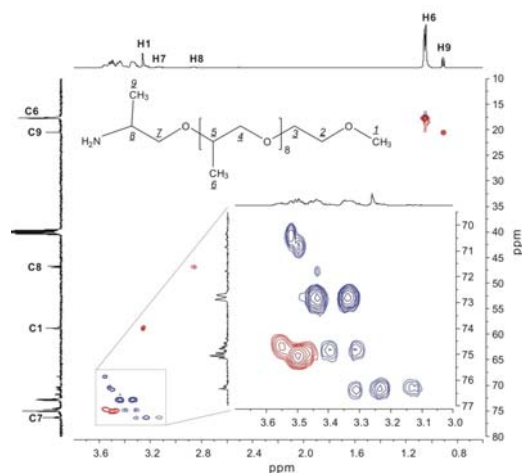

**Figure S1.** 2D  $^1\text{H}$ - $^{13}\text{C}$  edited HSQC NMR spectra of Jeffamine M-600 in  $\text{DMSO-}d_6$  at 298 K. Red contour exhibits carbons of CH or  $\text{CH}_3$  (up) whereas blue contour is associated with  $\text{CH}_2$  (down). Peaks in the range of  $\delta_{\text{H}} = 3.70 - 2.86$  ppm of horizontal  $^1\text{H}$  spectra correspond to CH and  $\text{CH}_2$  protons of Jeffamine M-600.

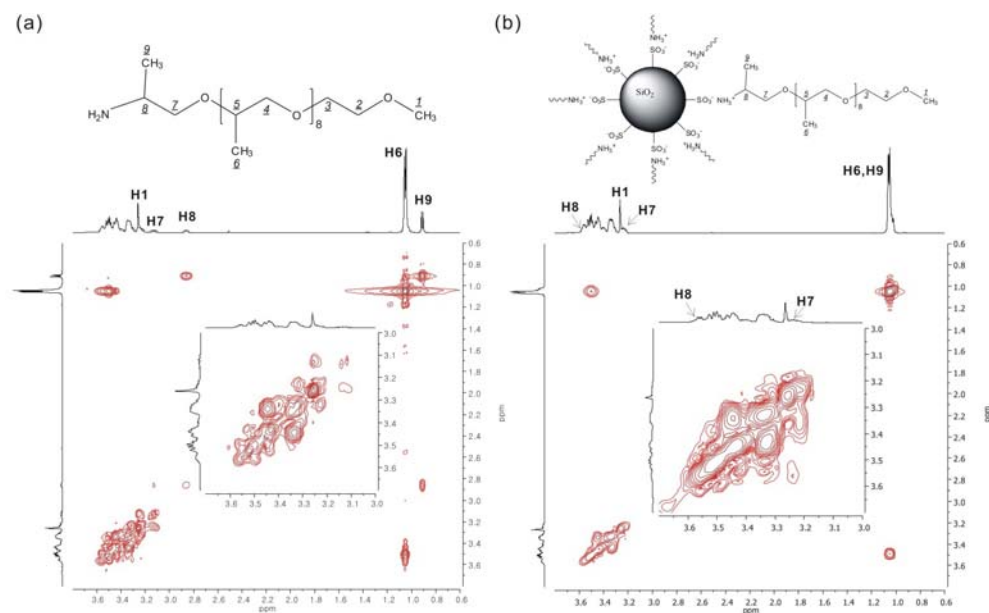

**Figure S2.** 2D COSY NMR spectra of (a) Jeffamine M-600 and (b) NOHM-I-PE600 in  $\text{DMSO-}d_6$  at 298 K.

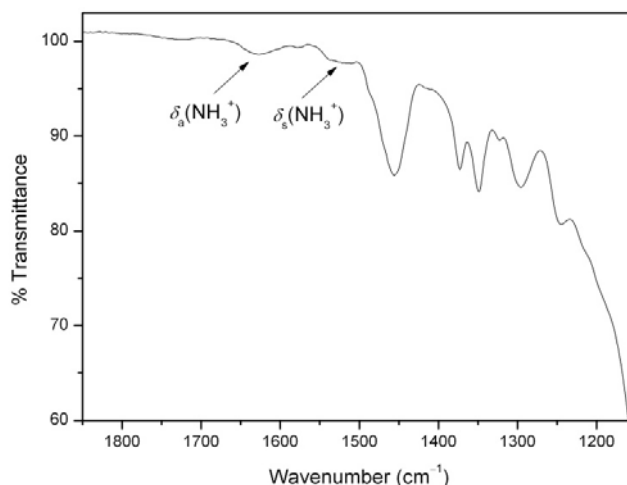

**Figure S3.** ATR FT-IR spectrum of NOHM-I-PE600 in the range of bending modes of  $-\text{NH}_3^+$ .

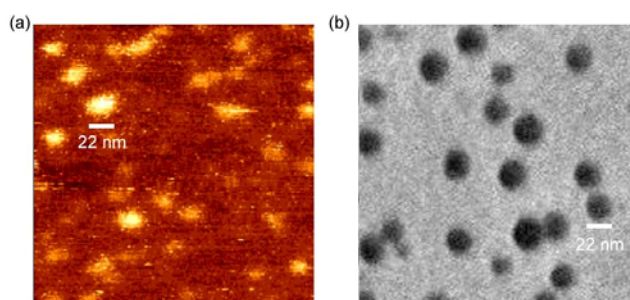

**Figure S4.** (a) AFM and (b) TEM images of NOHM-I-PE2070 (22 nm  $\text{SiO}_2$  core). For the AFM measurements, NOHM-I-PE2070 was dissolved into acetone (7 mg/ml) and the solution was spin-coated at 4000 rpm on a freshly cleaved mica substrate (V-4 grade muscovite). The sample was mounted on the AFM and scanned using a silicon probe (PPP-NCHR, NANOSENSORS<sup>TM</sup> (Switzerland)) with a resonance frequency of  $\sim 300$  kHz and a force constant of 42 N/m.

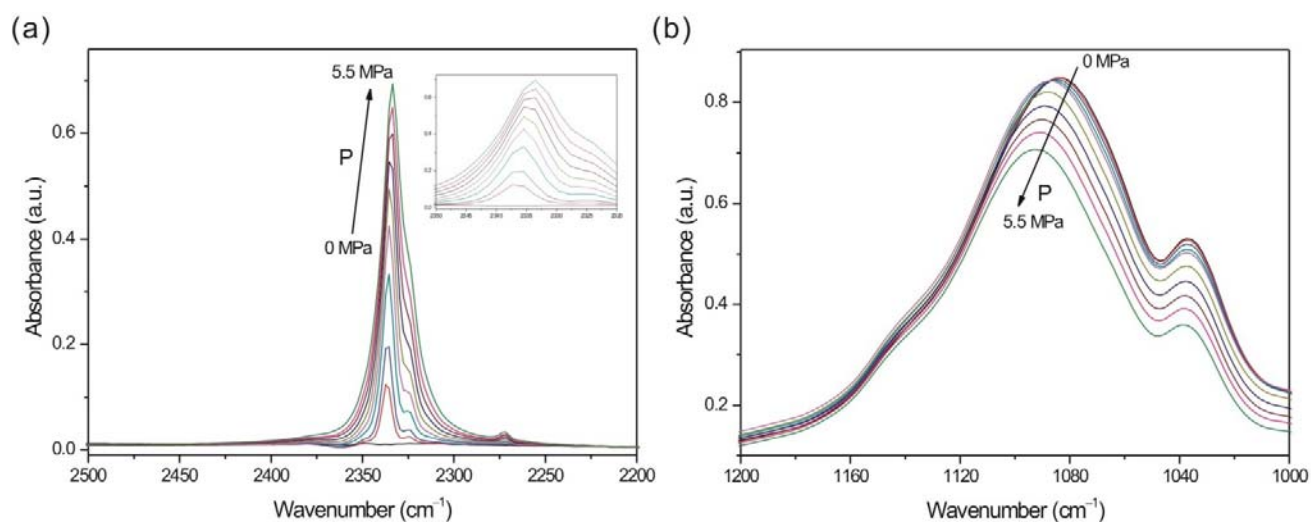

**Figure S5.** ATR FT-IR Spectra of NOHM-I-PE2070 under elevated  $\text{CO}_2$  partial pressure at 298 K. (a) Intensity changes of  $\nu_3$  band of  $\text{CO}_2$  absorption at  $2335 \text{ cm}^{-1}$  as a function of pressure (0 – 5.5 MPa). (b) Intensity changes of the absorption bands of C–O ( $\sigma$  bond) as a function of  $\text{CO}_2$  pressure (0 – 5.5 MPa).

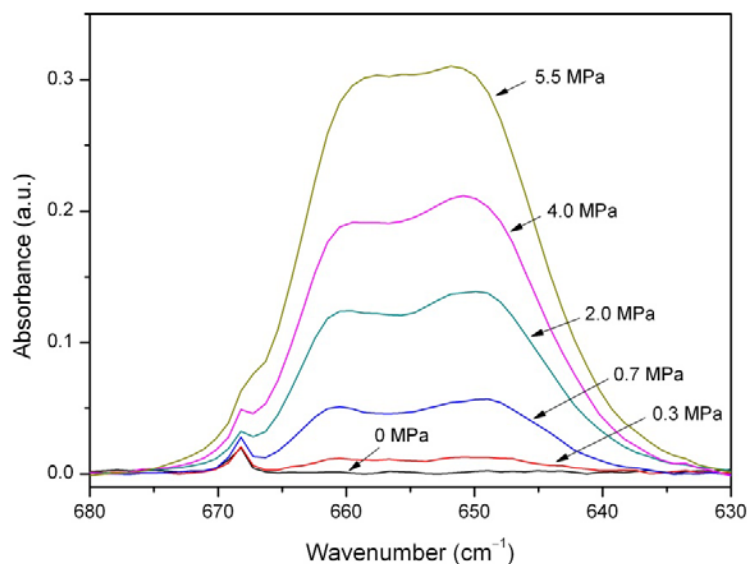

**Figure S6.** ATR FT-IR peak behavior of  $\nu_2$  band of  $\text{CO}_2$  as a function of pressure (0 – 5.5 MPa) at 298 K.
